# Supplementary material
Source: PubMed Central journal article supplement (PMC5581708)
Supplement: NIHMS881863-supplement-4.pdf [file NIHMS881863-supplement-4.pdf]

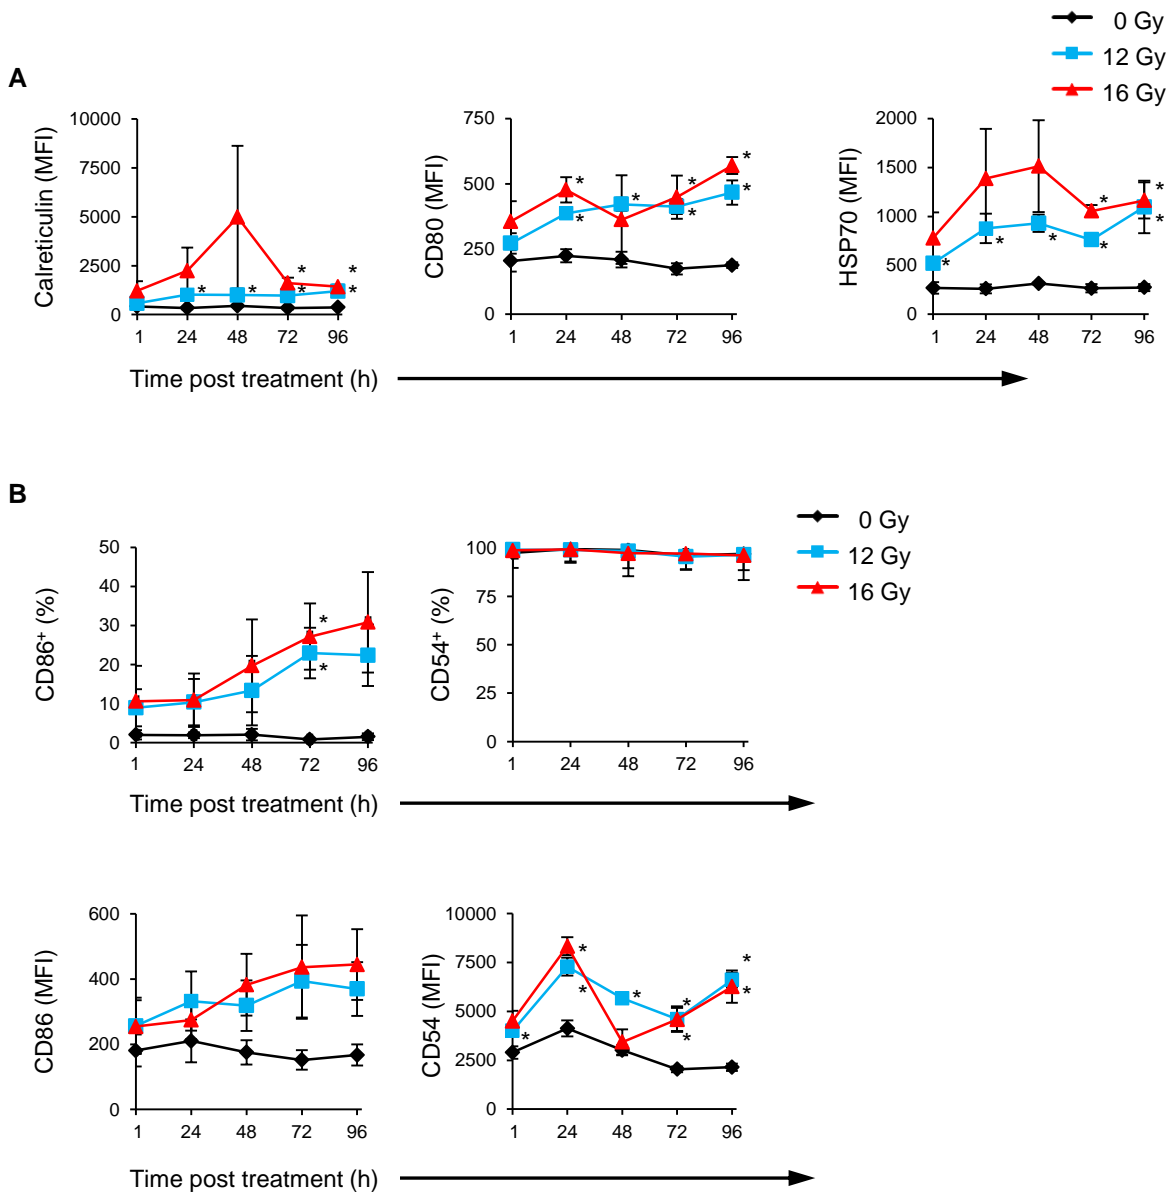

**Supplementary Figure S1. Radiation induces changes in surface expression of immunogenic molecules.** A498 cells were treated or untreated with radiation and mean fluorescence intensity (MFI) of immunomodulatory markers was measured at indicated times by flow cytometry (A). CD86 and CD54 expression (B) was evaluated and shown by percentage positive tumor cells (top) and MFI (bottom). Data are from  $\geq 3$  independent experiments (mean  $\pm$  s.e.m.). \* $P < 0.05$  vs. 0 Gy; unpaired two-tailed Student's *t*-test.
