# Supplementary material
Source: PubMed Central journal article supplement (PMC5581708)
Supplement: NIHMS881863-supplement-6.pdf [file NIHMS881863-supplement-6.pdf]

A

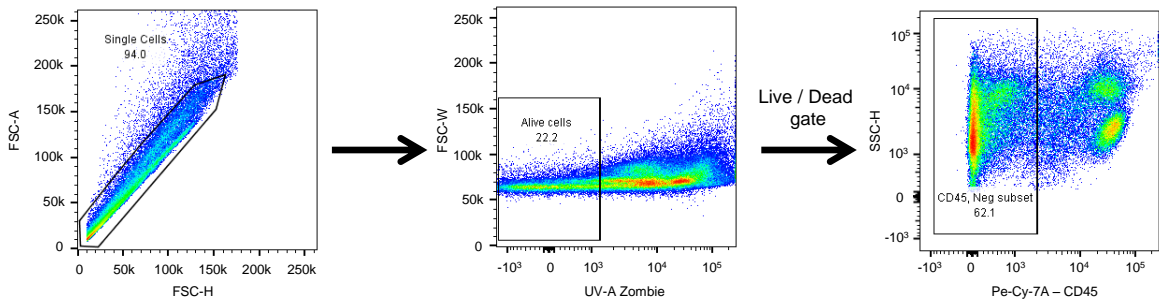

B

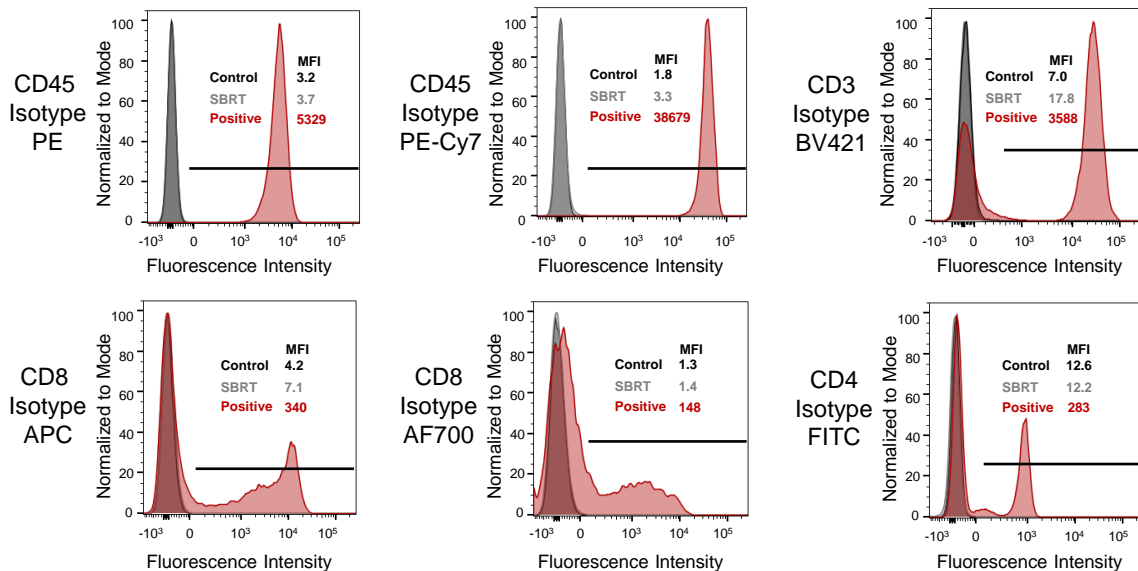

**Supplementary Figure S3. Gating strategy and isotype staining of live tumor cells used for patient samples.** Single cells were gated based on a size and live cells were isolated by exclusion of viability dye (A). Finally, CD45<sup>-</sup> cells were identified and selected to exclude the immune component of the samples. PBMC samples from healthy donors were utilized as positive controls and analyzed for CD45, CD3, CD8, and CD4 by flow cytometry (B). Control (archived nephrectomy) or SBRT (radiation plus nephrectomy) RCC patient primary tumors were stained for matched isotypes by flow cytometry. Single parameter flow histograms of representative samples are shown (MFI is indicative of sample shown). Line indicates portion of sample that is positive for the marker. Data are representative of  $\geq 3$  independent experiments.
